1     **An interferon lambda 4-associated variant in the hepatitis C virus RNA**  
2                     **polymerase affects viral replication in infected cells**

3                     Connor G G Bamford<sup>1,2</sup> and John McLauchlan<sup>1,#</sup>

4     <sup>1</sup> MRC-University of Glasgow Centre for Virus Research, 464 Bearsden Rd, Glasgow, G61  
5     1QH, Scotland, UK

6     <sup>2</sup> Wellcome-Wolfson Institute for Experimental Medicine, Queen's University of Belfast, 97  
7     Lisburn Rd, Belfast, BT97BL, Northern Ireland, UK

8

9     # Corresponding author: [john.mclauchlan@glasgow.ac.uk](mailto:john.mclauchlan@glasgow.ac.uk)

10

11     Keywords: hepatitis C virus, HCV, NS5B, IFN $\lambda$ 4, RNA replication

12

13     **Abstract**

14

15             **Host *IFNL4* haplotype status contributes to the development of chronic hepatitis**  
16     **C virus infection in individuals who are acutely infected with the virus. *In silico* studies**  
17     **revealed that specific amino acid variants at multiple sites on the HCV polyprotein**  
18     **correlate with functional single nucleotide polymorphisms (SNPs) in the *IFNL4* locus.**  
19     **Thus, SNPs at the *IFNL4* locus may select variants that influence virus replication and**  
20     **thereby outcome of infection. Here, we examine the most significantly *IFNL4*-associated**  
21     **amino acid variants that lie in the ‘Lambda (L) 2 loop’ of the HCV NS5B RNA**  
22     **polymerase. L2 loop variants were introduced into both sub-genomic replicon and full-**  
23     **length infectious clones of HCV and viral replication examined in the presence and**  
24     **absence of exogenous IFN $\lambda$ 4. Our data demonstrate that while mutation of NS5B L2**  
25     **loop affects replication, individual *IFNL4*-associated variants have modest but**

26 **consistent effects on replication both in the presence and absence of IFN $\lambda$ 4. Given the**  
27 **strong genetic association between these variants and *IFNL4*, these data suggest a**  
28 **nuanced effect of each individual position on viral replication, the combined effect of**  
29 **which might mediate resistance to the effects of IFN $\lambda$ 4.**

30

31 **Full-text**

32 Clearance of HCV is associated with genetic and functional variation in the human  
33 IFN lambda 4 (*IFNL4*) gene (1). Recent analyses of unbiased ‘genome-to-genome’ variant  
34 association has also identified correlations between HCV genetic polymorphisms at specific  
35 sites across the virus genome and *IFNL4* variation (2–4). This suggests that virus populations  
36 in those producing functional *IFNL4* differ from those generating the non-functional or less  
37 potent forms of the protein. Thus, there may be an interaction between host and viral genetic  
38 variants that ultimately affects viral chronicity. A previous report characterised one variant in  
39 NS5A, which was linked to serum viral load in individuals expressing functional *IFNL4*  
40 indicating that this *IFNL4*-associated site may affect virus replication in the sub-genomic  
41 replicon (SGR) system (2). However, studies on robust full-length HCV cell culture (HCVcc)  
42 infectious systems have not been carried out. Furthermore, the most significant *IFNL4*-  
43 associated variant (A150V) in the NS5B protein has not been examined in detail for any  
44 contribution to the viral replication process in such systems.

45 The region encompassing A150V and an additional cluster of *IFNL4*-associated  
46 variants is located between amino acids (aa) aa2567 to aa2576 in the HCV polyprotein and  
47 lie towards the N-terminus of the virus-encoded NS5B RNA-dependent RNA polymerase  
48 (RdRp; positions 2567, 2568, 2570, 2576 correspond to residues 147, 148, 150 and 156 in  
49 NS5B; **Fig 1A**). This region corresponds to a relatively variable segment termed ‘motif F’ in  
50 the N-terminal finger domain of conserved viral RdRp enzymes of RNA viruses, and has  
51 been termed the lambda (L) 2 loop (**Fig 1A and B**) (5,6). Comparison of HCV RdRp  
52 sequences across other families in the *Flaviviridae*, including the Flaviviruses, Pegiviruses  
53 and Pestiviruses, revealed invariant amino acid residues flanking the L2 loop in regions  
54 termed F1 and F2. Upstream of the L2 loop is a conserved KXE motif (X=N/K/R depending  
55 on the virus family) while in the downstream region are invariant lysine, arginine and

56 isoleucine residues in a KXXRXI motif (**Fig 1B**). Within the L2 loop there were no invariant  
57 residues. Sequence comparison of amino acid sequences for the L2 loop among and within  
58 HCV genotypes further demonstrated variability of this region (**Fig 1C**). Positions 148 and  
59 150 showed the greatest variability although we noted also lack of sequence identity at  
60 positions 146 and 154. In addition, the proline residue in the F2 region displayed some  
61 intergenotype diversity. Based on the crystal structure of HCV NS5B the L2 loop  
62 corresponds to a flexible surface-exposed loop in the closed conformation of the protein  
63 where it extends outwards and over the nucleotide tunnel (**Fig 1D and E**) (6). Amino acids at  
64 positions 148 and 150 with the greatest variability lie at the extremity of the loop.

65         Based on the above analyses, we constructed four SGR and HCVcc L2 loop mutants  
66 in a JFH1 gt2a SGR construct containing a GLuc reporter and the Jc1 HCVcc infectious  
67 clone (7,8). We chose to utilise the JFH1/Jc1 system because the documented *IFNL4*-  
68 associated variable position 150 is found not only in gt3a but also in gt2 sequences. Therefore  
69 we were able to exploit the high replication capability of the well-characterised JFH1/Jc1  
70 system. Our strategy was to create substitutions at positions 148 (D148A), 150 (A150V) and  
71 a double substitution at positions 148 and 150 (D148Q.A150E) thereby reconstituting the  
72 gt1a sequences at these positions (**Fig 1C**). Gt1a is considered a relatively IFN-resistant HCV  
73 subtype and these positions have been implicated in this phenotype as well as association  
74 with *IFNL4/IL28B* genotype (9). We also constructed a P156A variant, identified as  
75 associated with *IFNL4* genotype in 4 HCV subtypes (2–4) to determine whether altering this  
76 position in the F2 region created a functional defect that would affect replication. Briefly the  
77 NS5B-coding region was sub-cloned into a plasmid vector and site-directed mutagenesis used  
78 to alter residues before transferring the mutated fragments into the SGR plasmid and then into  
79 HCVcc plasmids. Mutagenesis primers used are available on request. All mutations in the  
80 final constructs were confirmed by sequencing.

81 RNA from the SGR constructs was generated by *in vitro* transcription (IVT) using the  
82 manufacturer's instructions (T7 RiboMAX, Promega, UK) and transfected (200ng) into sub-  
83 confluent monolayers of Huh7 cells in 96 well plates using Lipofectamine 2000 (1µl per µg  
84 RNA) using manufacturer's instructions (ThermoFisher Scientific, UK). GLuc activity in 5%  
85 of the supernatant (10µl) was assessed at 4, 24, 48 and 72hrs post transfection using the  
86 manufacturer's instructions. Reporter activity for each construct was compared to a  
87 replication-defective 'GND' mutant (**Fig 2A**). Each of the mutant constructs plateaued  
88 around 48hrs post transfection and reached a peak activity by 72hrs, achieving levels that  
89 were not significantly different from the WT construct. However, we noted that D148A gave  
90 10-fold lower luciferase activity at 24hrs and 48hrs post transfection. Both the double mutant  
91 D148Q.A150E and A150V constructs also yielded less activity than WT (~5-fold and ~2-  
92 fold, respectively) at earlier times post transfection.

93 The same four mutants were introduced into the Jc1 HCVcc system to allow analysis  
94 of viral multicycle replication. Following IVT of HCVcc RNA and electroporation into Huh7  
95 cells virus-containing supernatants were harvested at least 3 days later and infectivity titrated  
96 by TCID<sub>50</sub> using an NS5A-specific antibody (10). All RNAs produced infectious virus,  
97 although D148A yielded ten-fold less infectious virus (data not shown). Sequences of the  
98 mutated versions of HCVcc were confirmed by Sanger sequencing of RT-PCR amplicons; no  
99 changes at the consensus level were found apart from D148A, which failed to yield an RT-  
100 PCR product, presumably due to reduced replication of viral RNA (data not shown).  
101 Assessment of HCVcc RNA accumulation at 72hpi following infection of Huh7 cells infected  
102 at MOI of 0.01 showed that while HCVcc viral RNA was detected by RT-qPCR as  
103 previously described (7) in all infections, only D148A and D148Q.A150E showed major  
104 differences (**Fig 2B**). D148A gave a 100-fold reduction in RNA accumulation and

105 D148Q.A150E a more modest 2-fold reduction in RNA accumulation. A150V and P156A led  
106 to slight (less than 1.5-fold) but consistent increases in viral RNA accumulation.

107 One of our main objectives in the study was to examine whether A150V, which is  
108 associated with host *IFNL4* genotype, would affect multicycle HCV replication in the  
109 presence or absence of IFN $\lambda$ 4 using an *in vitro* model system. We have previously  
110 established a system to test the antiviral activity of WT human IFN $\lambda$ 3 and IFN $\lambda$ 4 on HCV  
111 infection (11). Huh7 cells, treated with exogenous transfected-cell ‘conditioned media’ (CM)  
112 containing IFNs, were transfected with WT and mutant SGR RNAs or infected with WT and  
113 mutant HCVcc; GLuc activity was assayed at 48hpt (for SGR) and viral RNA measured at  
114 72hpi (for HCVcc). Given the low replication of SGR and HCVcc constructs carrying the  
115 D148A mutation, we excluded these constructs from further analysis. Pre-treatment of Huh7  
116 cells with exogenous IFN $\lambda$ s gave a greater reduction with IFN $\lambda$ 3 compared to IFN $\lambda$ 4 for  
117 Gluc activity from SGR (**Fig 2C and D**) and viral RNA from HCVcc constructs (**Fig 2E and**  
118 **F**) compared to cells treated with a control CM from EGFP plasmid-transfected controls.  
119 These results were similar to our previous analyses (11). SGRs containing mutations had  
120 reduced replication in EGFP-CM-treated cells compared to WT (**Fig 2C**), consistent with  
121 data presented in Fig 2A at 48hpt (**Fig 2A**). IFN $\lambda$  pre-treatment inhibited SGR replication  
122 and, by normalising the data to that from EGFP CM-treated cells, the mutations introduced  
123 into the SGR had a modest effect on replication in IFN $\lambda$ 4-treated cells, with all mutants  
124 yielding approximately ~1.5-fold higher Gluc levels compared to the WT construct treated  
125 with IFN $\lambda$ 4 (**Fig 2D**). By comparison, IFN $\lambda$ 3 gave a more pronounced inhibition for all  
126 SGRs. Similar to the data in Fig 2B, the HCVcc D148Q.A150E mutant had reduced  
127 replication in EGFP-CM-treated cells compared to WT (**Fig 2E**). IFN $\lambda$  pre-treatment  
128 inhibited HCVcc RNA synthesis and, from normalisation with EGFP CM-treated cells,  
129 showed that the D148Q.A150V mutant led to similar RNA accumulation as the WT construct

130 (Fig 2F). However, the A150V and P156A substitutions yielded a ~1.5-fold increase in RNA  
131 levels similar to what was observed in SGR assays, suggestive of a consistent lower fall in  
132 replication compared to the WT construct in the context of prior IFN $\lambda$ 4 treatment. Again,  
133 IFN $\lambda$ 3 pre-treatment robustly suppressed viral replication and we observed no apparent  
134 differences between mutants. We conclude that in the presence of exogenous IFN $\lambda$ 4 viral  
135 replication is modestly elevated for the A150V and P156A variants, located in the L2 loop in  
136 NS5B.

137 All of the variants introduced into the L2 loop and F2 region in the replicon and  
138 infectious systems were natural polymorphisms that occur in at least one HCV subtype (Fig  
139 1C). Since they were natural variants, we expected that they may have modest effects on viral  
140 RNA replication and virion production. However, we observed a substantial drop in viral  
141 RNA levels at earlier times in the replicon assay and poor yields of virus for the D148A  
142 substitution. An alanine residue is found at position 148 only for gt11, a rare subtype that is  
143 typically found in sub-Saharan Africa. By contrast, replacing both residues at positions 148  
144 and 150 recreated the most frequently found amino acids in gt1a (D148Q.A150E) and  
145 replication was decreased by <2-fold. Moreover, the other variants that were studied (A150V  
146 and P156A) had no overall effect on replication in the SGR system when compared to the  
147 WT construct and indeed, gave a modest increase in viral RNA in the infectious model.  
148 Therefore, except for D148A, the substitutions were well tolerated in NS5B.

149 Recent molecular dynamics data has provided greater insight into the likely function  
150 of the HCV F domain in organising the entry of nucleotides for access to the active site as  
151 well as exit of pyrophosphate during the replication process (12). Prior to nucleotide access to  
152 the active site, the F domain coordinates nucleotide reorientation and base stabilisation  
153 through rearrangement of salt bridge interactions involving K151 (with either D352 or D387  
154 depending on conformation) and R158 (with E143). The other residues comprising the F1-

155 L2-F2 region are likely to provide functional properties such as coordinating the  
156 opening/closure of the nucleotide tunnel, structural flexibility and perhaps some nucleotide  
157 selectivity. Furthermore, a K151R mutation rescued infectivity of a P7 mutant HCVcc but  
158 had no measurable effect on replication nor NS5B activity *in vitro* (13). Another study  
159 identified a potential interaction between the L2 loop and domain II of NS5A (14). Thus, the  
160 L2 loop may participate in interactions with other regions of NS5B (for RNA replication) and  
161 with other viral proteins like NS5A and P7/NS2 (e.g. for assembly). Both D148 and A150 are  
162 located on the surface of L2, facing downwards towards incoming nucleotides. These  
163 residues lie immediately to the N-terminal side of residue K151, which is nearly completely  
164 invariant and forms a critical salt bridge with D352, bisecting the nucleotide entry site in the  
165 closed conformation of the L2 loop. The presence of variant amino acid residues immediately  
166 upstream of K151 could have modulatory effects on the behaviour of the L2 loop. Clearly  
167 from our data, the D148A substitution has a substantial impact on viral RNA replication  
168 suggesting that it impairs the function of the L2 loop in the context of the HCVgt2a strain  
169 JFH1/Jc-1. By contrast, both double variants at positions 148 and 150 (D148Q.A150E) and a  
170 single variant at position 150 (A150V) are well tolerated. Thus, it is possible to introduce  
171 intragenotypic and intergenotypic substitutions into L2 without disrupting function. This  
172 indicates a degree of redundancy in the L2 loop sequences. However, it is possible that  
173 certain variants have subtle effects on the selectivity of incoming nucleotides. For example,  
174 the A150V variant gave reduced susceptibility to the nucleotide analogue sofosbuvir, which  
175 is a clinically approved and highly potent direct acting antiviral (15). This reduced potency  
176 could arise from lower capacity of the A150V substitution to allow sofosbuvir entry to the  
177 catalytic site of the polymerase. Furthermore, we see differences between the HCV  
178 subgenomic replicon and infectious virus assays for A150V (and P156A) such that these



179 mutations affect viral replication in the replicon but not the HCVcc system. This may suggest  
180 differing roles of these sites in replication compared to assembly.

181 Our data reveal that mutations A150V and P156A influence viral replication in the  
182 presence of exogenous IFN $\lambda$ 4 such that, for both variants, the reduction in replication was  
183 less in both SGR and HCVcc systems compared to the WT control. These results suggest that  
184 V150 and A156 confer slight resistance to IFN $\lambda$ 4. The higher prevalence for V150 in those  
185 with *IFNL4* alleles that produce functional protein would suggest a fitness advantage for this  
186 variant, which may be consistent with the partial IFN $\lambda$ 4 resistance observed in our assays.  
187 However, viral load is lower in chronic infection in individuals who have *IFNL4* alleles that  
188 produce IFN $\lambda$ 4 compared to those who fail to make functional protein (2,3). Thus, our data  
189 illustrate the challenge with aligning *in vitro* results to understand the mechanisms underlying  
190 *in vivo* findings. It is possible that there are epistatic effects, which would be difficult to  
191 ascertain with *in vitro* methods that do not recapitulate infection by natural strains. In  
192 conclusion, we have characterised replicative effects of variants associated with *IFNL4*  
193 genotype that could serve as the basis for further studies into the role of viral variability in  
194 physiologically-relevant *in vitro* models.

195

#### 196 **Author statements**

197 CB and JM conceived the project and established the goals of the study; CB conducted all  
198 experiments; CB and JM analysed and interpreted the data; CB and JM were responsible for  
199 writing and preparing the manuscript.

200

#### 201 **Funding information**

202 This work was supported by the UK Medical Research Council (MC\_UU\_12014/1).

203

204 **Acknowledgements**

205 We wish to thank undergraduate students Maria Chalmers and Aqsa Sharif for their help with  
206 this project.

207

208 **Conflicts of interest**

209 The authors declare that there are no conflicts of interest.

210

## 211 References

- 212 1. Prokunina-Olsson L, Muchmore B, Tang W, Pfeiffer RM, Park H, Dickensheets H, et  
213 al. A variant upstream of IFNL3 (IL28B) creating a new interferon gene IFNL4 is  
214 associated with impaired clearance of hepatitis C virus. *Nat Genet.* 2013 Jan  
215 45(2):164–71.
- 216 2. Ansari MA, Pedergnana V, L C Ip C, Magri A, Von Delft A, Bonsall D, et al.  
217 Genome-to-genome analysis highlights the effect of the human innate and adaptive  
218 immune systems on the hepatitis C virus. *Nat Genet.* 2017;49(5):666–73.
- 219 3. Ansari MA, Aranday-Cortes, L C Ip C, da Silva Filipe, Lau S H, Bamford CGG et al.  
220 Interferon Lambda 4 Impacts the Genetic Diversity of Hepatitis C Virus. *Elife.* 2019;8.
- 221 4. Chaturvedi N, Svarovskaia E S, Mo H, Osinusi A O, Brainard D M, Subramanian G  
222 M, et al. Adaptation of Hepatitis C Virus to Interferon Lambda Polymorphism Across  
223 Multiple Viral Genotypes. *Elife.* 2019;8.
- 224 5. Selisko B, Papageorgiou N, Ferron F, Canard B. Structural and Functional Basis of the  
225 Fidelity of Nucleotide Selection by Flavivirus RNA-Dependent RNA Polymerases.  
226 *Viruses.* 2018;10(2).
- 227 6. Bressanelli S, Tomei L, Roussel A, Incitti I, Vitale RL, Mathieu M, et al. Crystal  
228 structure of the RNA-dependent RNA polymerase of hepatitis C virus. *Proc Natl Acad*  
229 *Sci U S A.* 1999;96(23):13034–9.
- 230 7. Domingues P, Bamford CGG, Boutell C, McLauchlan J. Inhibition of hepatitis C virus  
231 RNA replication by ISG15 does not require its conjugation to protein substrates by the  
232 HERC5 E3 ligase. *J Gen Virol.* 2015;96(11).

- 233 8. Pietschmann T, Kaul A, Koutsoudakis G, Shavinskaya A, Kallis S, Steinmann E, et al.  
234 Construction and characterization of infectious intragenotypic and intergenotypic  
235 hepatitis C virus chimeras. *Proc Natl Acad Sci*. 2006;103(19):7408–13.
- 236 9. Rose R, Markov P V, Lam TT, Pybus OG. Viral evolution explains the associations  
237 among hepatitis C virus genotype, clinical outcomes, and human genetic variation.  
238 *Infect Genet Evol*. 2013;20:418–21.
- 239 10. Lindenbach BD, Meuleman P, Ploss A, Vanwolleghem T, Syder AJ, McKeating J a, et  
240 al. Cell culture-grown hepatitis C virus is infectious in vivo and can be recultured in  
241 vitro. *Proc Natl Acad Sci U S A*. 2006;103(10):3805–9.
- 242 11. Bamford CGG, Aranday-Cortes E, Filipe IC, Sukumar S, Mair D, Filipe A da S, et al.  
243 A polymorphic residue that attenuates the antiviral potential of interferon lambda 4 in  
244 hominid lineages. Randall G, editor. *PLOS Pathog*. 2018 Oct;14(10):e1007307.
- 245 12. Ben Ouirane K, Boulard Y, Bressanelli S. The hepatitis C virus RNA-dependent RNA  
246 polymerase directs incoming nucleotides to its active site through magnesium-  
247 dependent dynamics within its F motif. *J Biol Chem*. 2019;294(19):7573–87.
- 248 13. Gouklani H, Bull RA, Beyer C, Coulibaly F, Gowans EJ, Drummer HE, et al. Hepatitis  
249 C Virus Nonstructural Protein 5B Is Involved in Virus Morphogenesis. *J Virol*.  
250 2012;86(9):5080.
- 251 14. Dujardin M, Cantrelle F-X, Lippens G, Hanouille X. Interaction study between HCV  
252 NS5A-D2 and NS5B using 19F NMR. *J Biomol NMR*. 2018;70(1):67–76.
- 253 15. Wing PAC, Jones M, Cheung M, DaSilva S, Bamford C, Jason Lee W-Y, et al. Amino  
254 Acid Substitutions in Genotype 3a Hepatitis C Virus Polymerase Protein Affect  
255 Responses to Sofosbuvir. *Gastroenterology*. 2019;157(3):692-704.e9.

256 **Figure 1. Location of *IFNL4*-associated positions in the L2 loop of HCV NS5B RNA**  
257 **polymerase.** (A) Schematic of the 3' end of the HCV genome showing the location of the  
258 NS5B motif F/L2 loop. (B and C) Amino acid alignment of the region encompassing motif F  
259 in the Flaviviridae (B) and in HCV reference sequences for genotypes 1-8 (C). *IFNL4*-  
260 associated positions are highlighted in bold in HCV reference sequences (for gt1a and gt2a in  
261 [B] and gt1a in [C]). Invariant (\*), conserved (:), and partially conserved (.) positions are  
262 highlighted directly above the alignment. Secondary structural elements in the HCV NS5B  
263 RNA polymerase are indicated above sequences (>> for  $\beta$ -strands for F1 and F2; -- for the  
264 non-structured L2 loop). HCV gt2a JFH1: AB047639.1; HCV gt1a H77: AF009606.1;  
265 human pegivirus 1: BAA19580.1; Simian pegivirus/GB-virus A: AHH32939.1; Dengue virus  
266 serotype 1 (DENV-1): QFS19562.1; Kyasanur Forest disease virus (KFDV): AXB87737.1;  
267 Bovine viral diarrheal virus (BVDV): AAF82566.1; classical swine fever virus (CSFV):  
268 AYE19937.1. HCV subtype accession numbers are as follows: 1a\_AF009606, 11\_KC248193,  
269 2a\_D00944, 2a\_AB047639, 2a\_HQ639944, 3a\_D17763, 3a\_JN714194, 4a\_Y11604,  
270 4g\_FJ462432, 5a\_AF064490, 6a\_Y12083, 7a\_EF108306, 7\_KU861171.1, 8\_pt1  
271 MH590698.1, 8\_pt2 MH590699.1, and 8\_pt4 MH590701.1. (D and E) Structure of the L2  
272 loop region in the HCV NS5B RNA polymerase. *IFNL4*-associated positions are shown with  
273 amino acid side-chains on the 4wti pdb structure of HCV gt2a JFH1 NS5B. The L2 loop is  
274 shown relative to the NTP channel and residue A150 (D) and *IFNL4*-associated positions are  
275 indicated in a higher magnification image (E).

276 **Figure 2. Effect of *IFNL4*-associated variants in the NS5B L2 loop on viral RNA**  
277 **replication in the presence and absence of IFN $\lambda$  proteins.** (A) Gluc activity at 4, 24, 48  
278 and 72hrs post transfection of Huh7 cells with *in vitro* transcribed SGR RNA. SGR  
279 constructs used are indicated and include a replication-incompetent 'GND' control. Data are  
280 shown relative (%) to the 4 hour Gluc activity for each construct ( $n=5$ ) (B) Viral genomic

281 RNA abundance at 72hpi following infection of Huh7 cells at a MOI of 0.01 with the  
282 indicated WT and mutant HCVcc viruses. Data are shown relative to WT HCVcc RNA,  
283 which was normalised to 1 ( $n=2$ ). (C and D) Sensitivity of WT and mutant SGRs (C and D)  
284 or HCVcc (E and F) to addition of exogenous IFN $\lambda$ 3 and IFN $\lambda$ 4 compared to an EGFP  
285 control. Gluc activity (C and D) or HCV genome RNA abundance (E and F) at 48hrs post  
286 transfection of Huh7 cells with *in vitro* transcribed SGR RNA or 72hpi following infection  
287 with HCVcc (MOI of 0.01) following treatment (24hrs) with IFN $\lambda$ 3 or IFN $\lambda$ 4 conditioned  
288 media (CM) (1:4) as well as the EGFP negative control CM. Data shown relative to WT SGR  
289 RNA/HCVcc from EGFP-treated cells (C and E) or to each construct EGFP-treated control  
290 (D and F) normalised to '1' ( $n=2$ ). Abundance of viral genomic RNA was measured at 72hpi  
291 relative to GAPDH mRNA. All data show mean (+/- standard error or the mean).

**Figure 1**

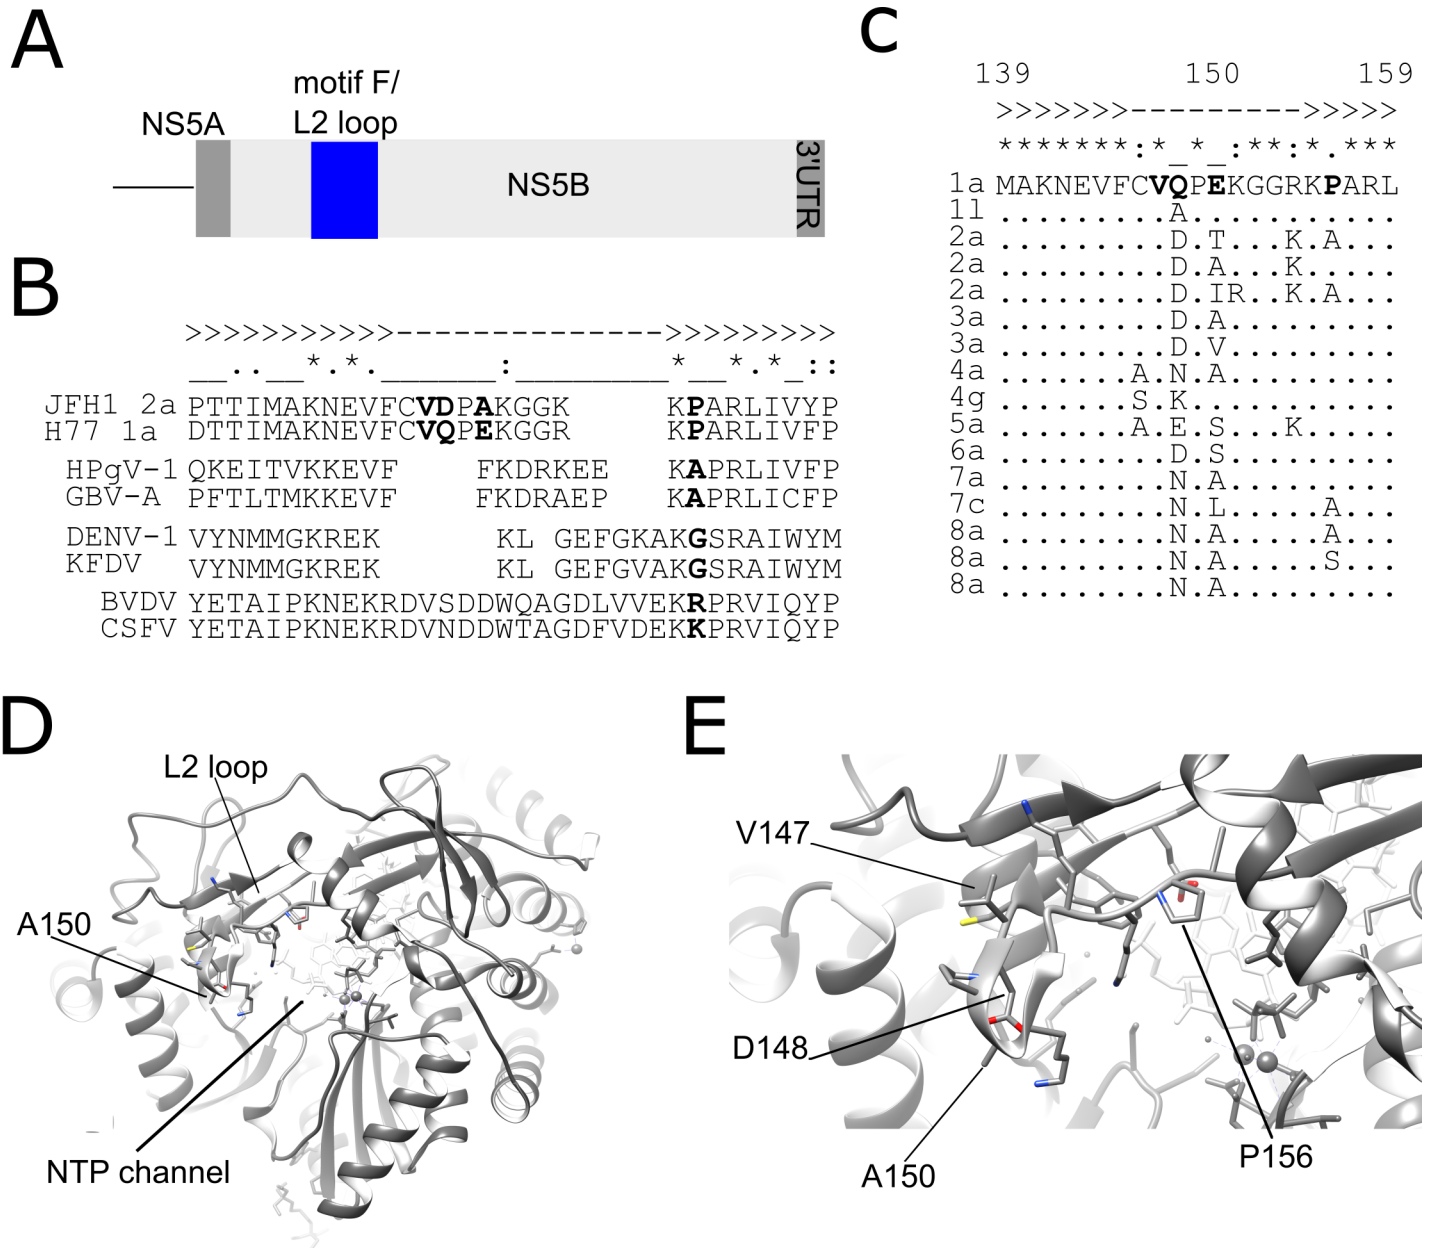

## Figure 2

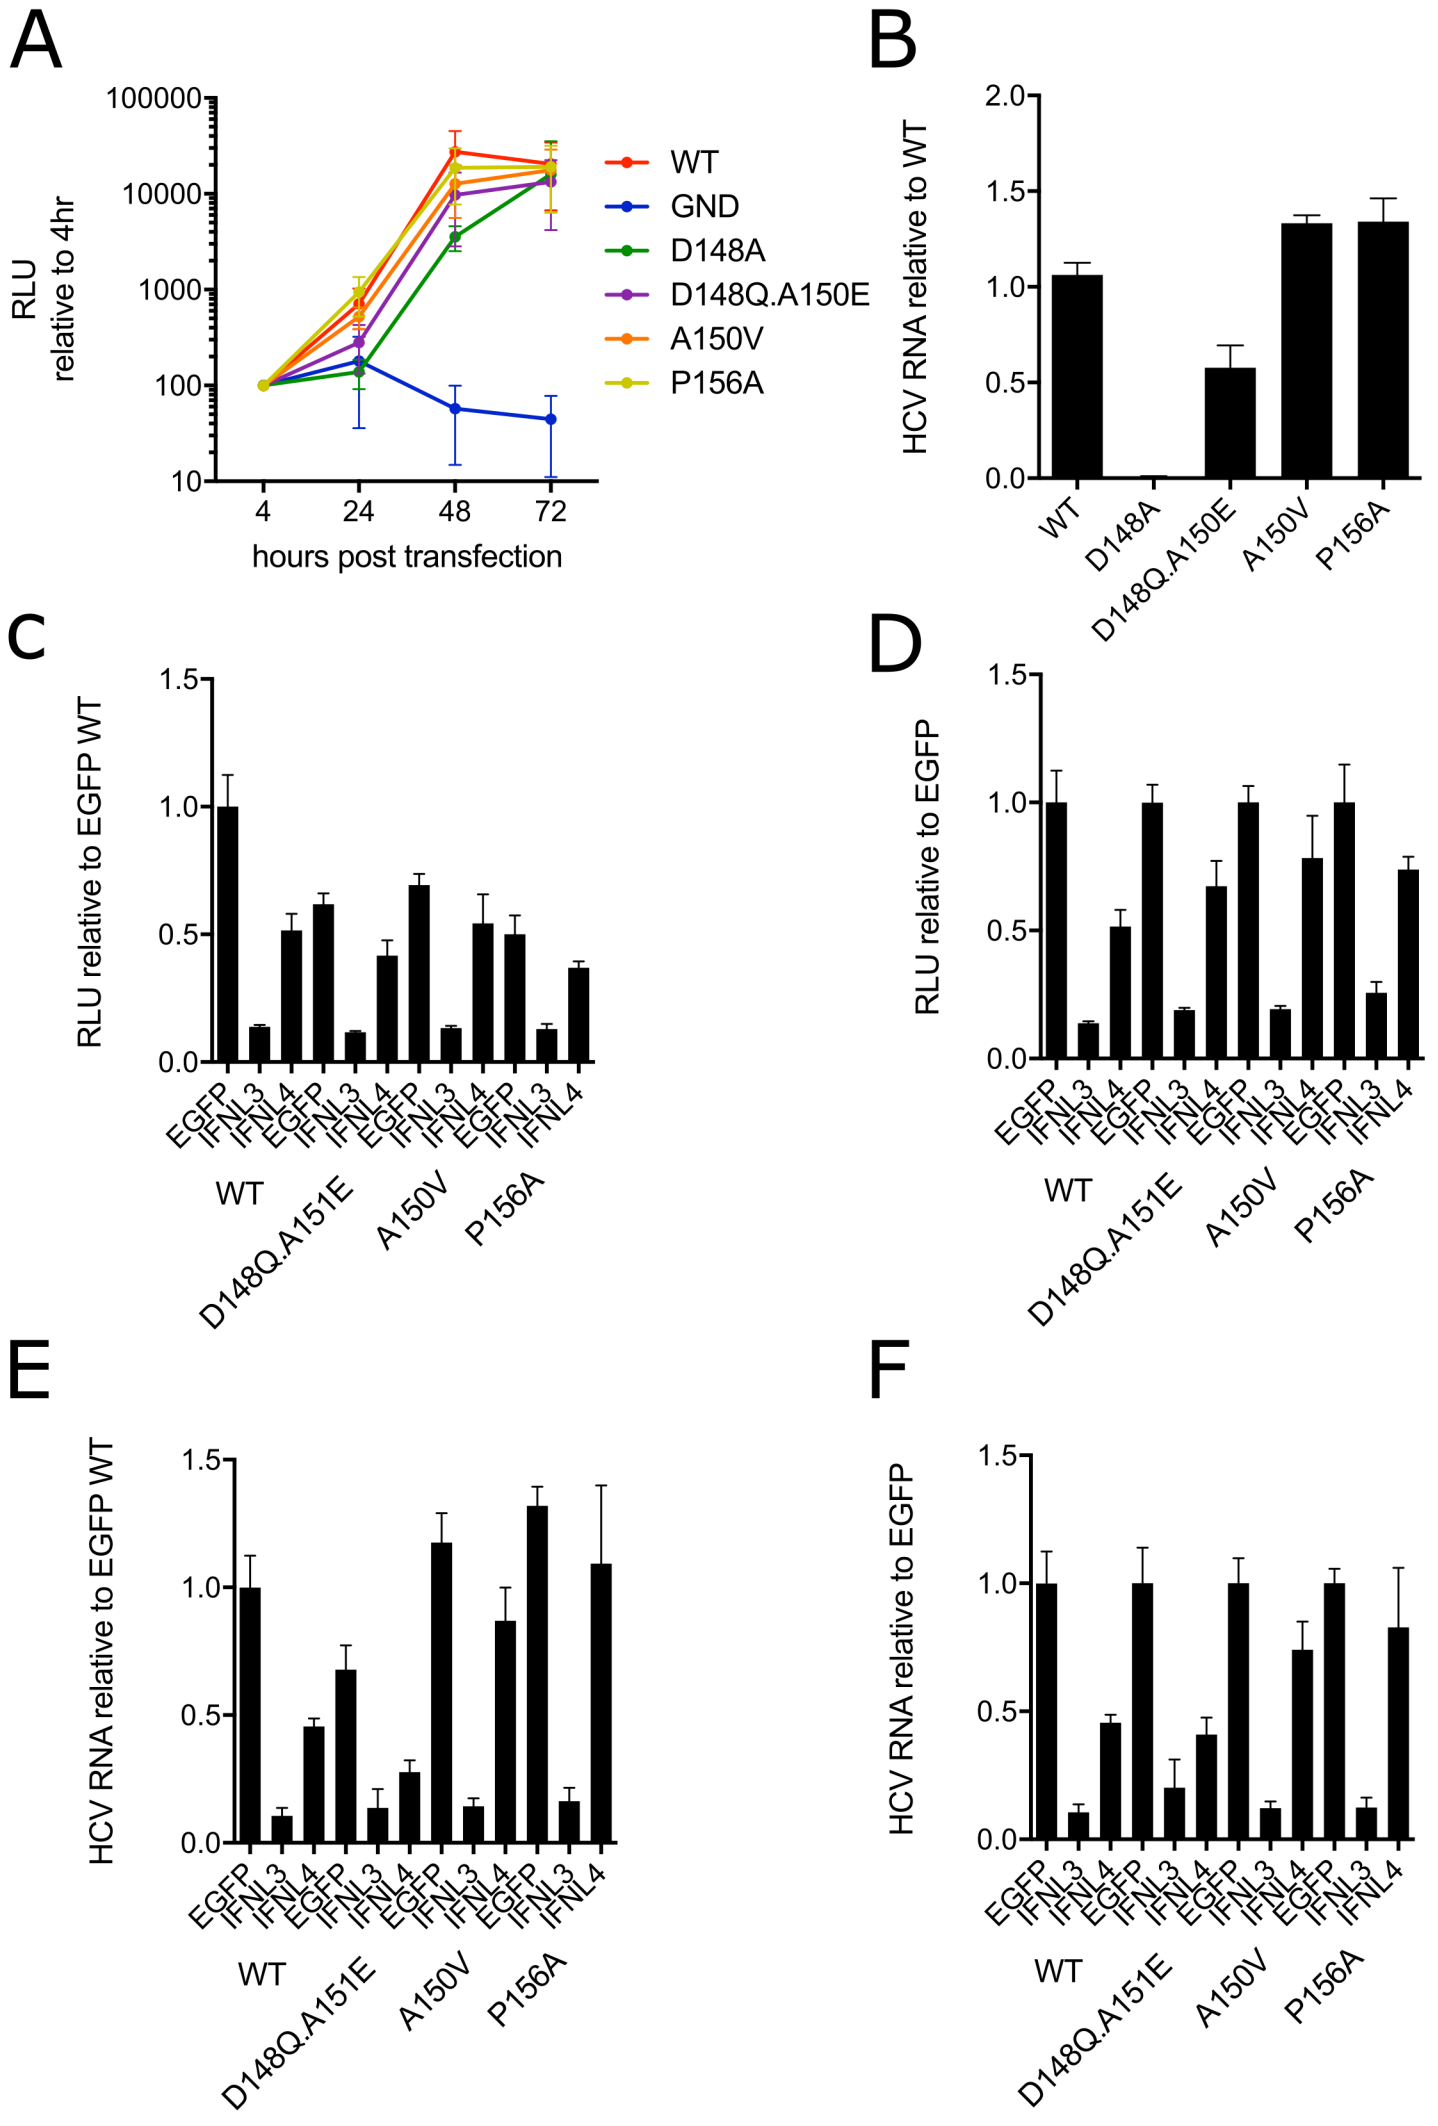

Source: https://www.biorxiv.org/content/10.1101/2020.06.22.164319v1.full.pdf
